# Supplementary material for: Solvent engineering to regulate the phase of copper zinc tin sulfide nanocrystals
Source: Royal Society of Chemistry journal article supplement (doi:10.1039/d2dt02899a), 2022-01-01
Supplement: d2dt02899a1.pdf [file d2dt02899a1.pdf]

**Electronic Supplementary Information on**

**Solvent engineering to regulate the phase of copper zinc tin  
sulfide nanocrystals**

Yan Zhu,<sup>a,b</sup> Hongmei Qing,<sup>b,c</sup> Wenbo Dong,<sup>b</sup> Mingrong Dong,<sup>b</sup> Tao Shen,<sup>b</sup> and Jian Cui<sup>\*,b</sup>

<sup>a</sup> Shanghai Technical Institute of Electronics & Information, Shanghai 201411, China

<sup>b</sup> Kunming University of Science and Technology, Kunming 650093, China

<sup>c</sup> Yibin Tianyuan Group Co., Ltd., Yibin 644002, China

Correspondence should be addressed to J.C. [tsuijian@gmail.com](mailto:tsuijian@gmail.com)

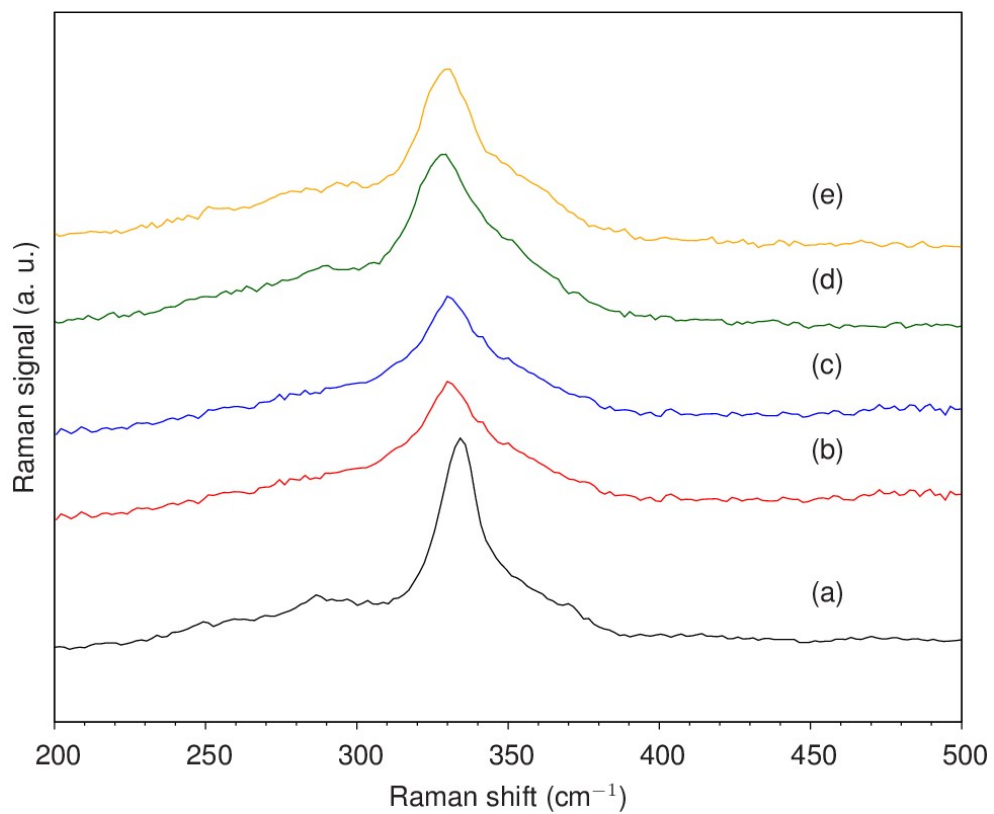

Fig. S1. Raman spectra of products fabricated with various EG:TETA solvent ratios, i.e. (a) 39:1, (b) 35:5, (c) 30:10, (d) 20:20, and (e) 5:35.

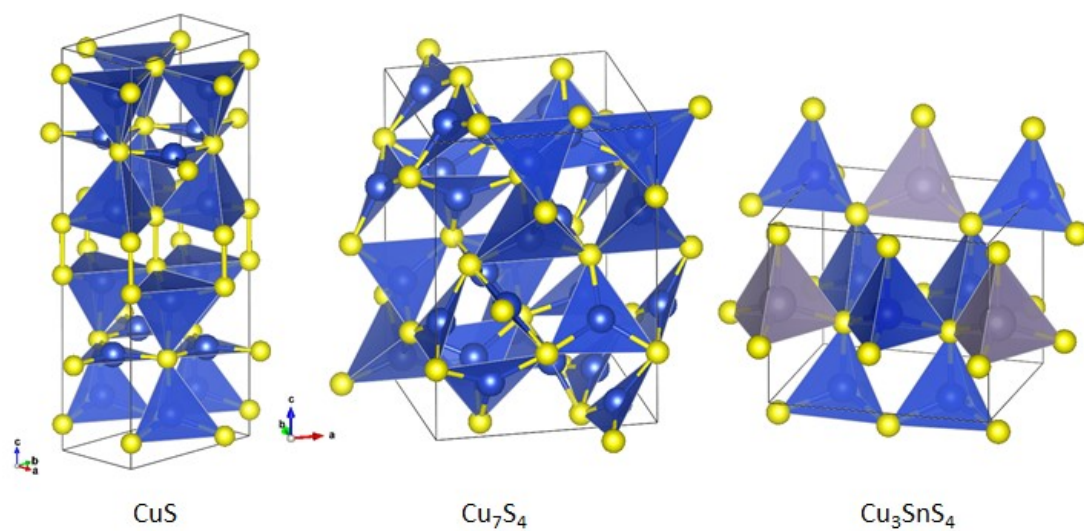

Fig. S2. Atomic structures of intermediate states of precipitates during synthesis. S atoms are yellow, Cu atoms are blue, Sn atoms are gray.

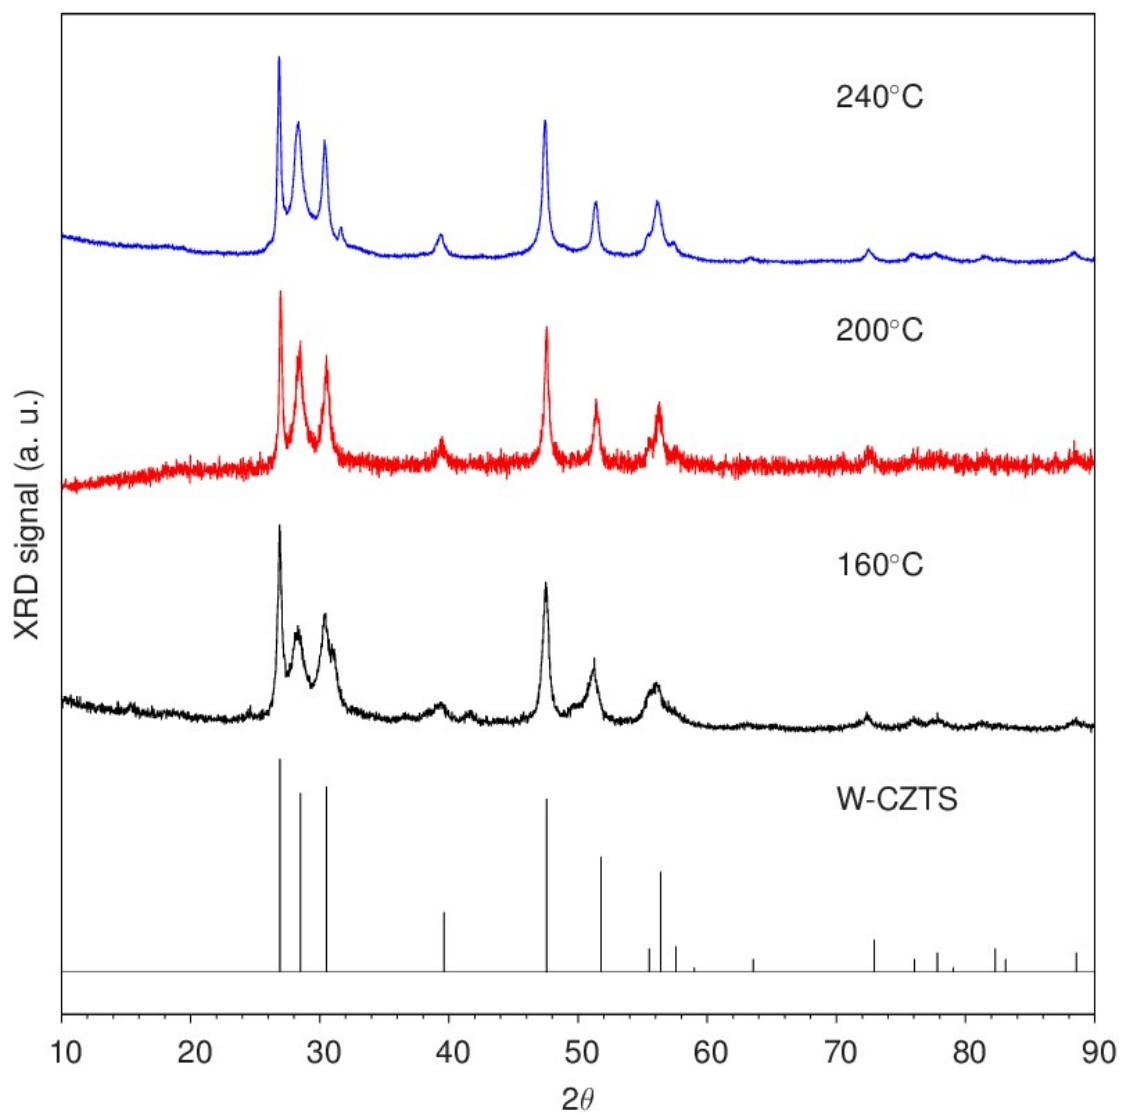

Fig. S3. XRD patterns of products synthesized at various temperatures at the 2nd heating stage. The ratio of EG:TETA was 20:20.

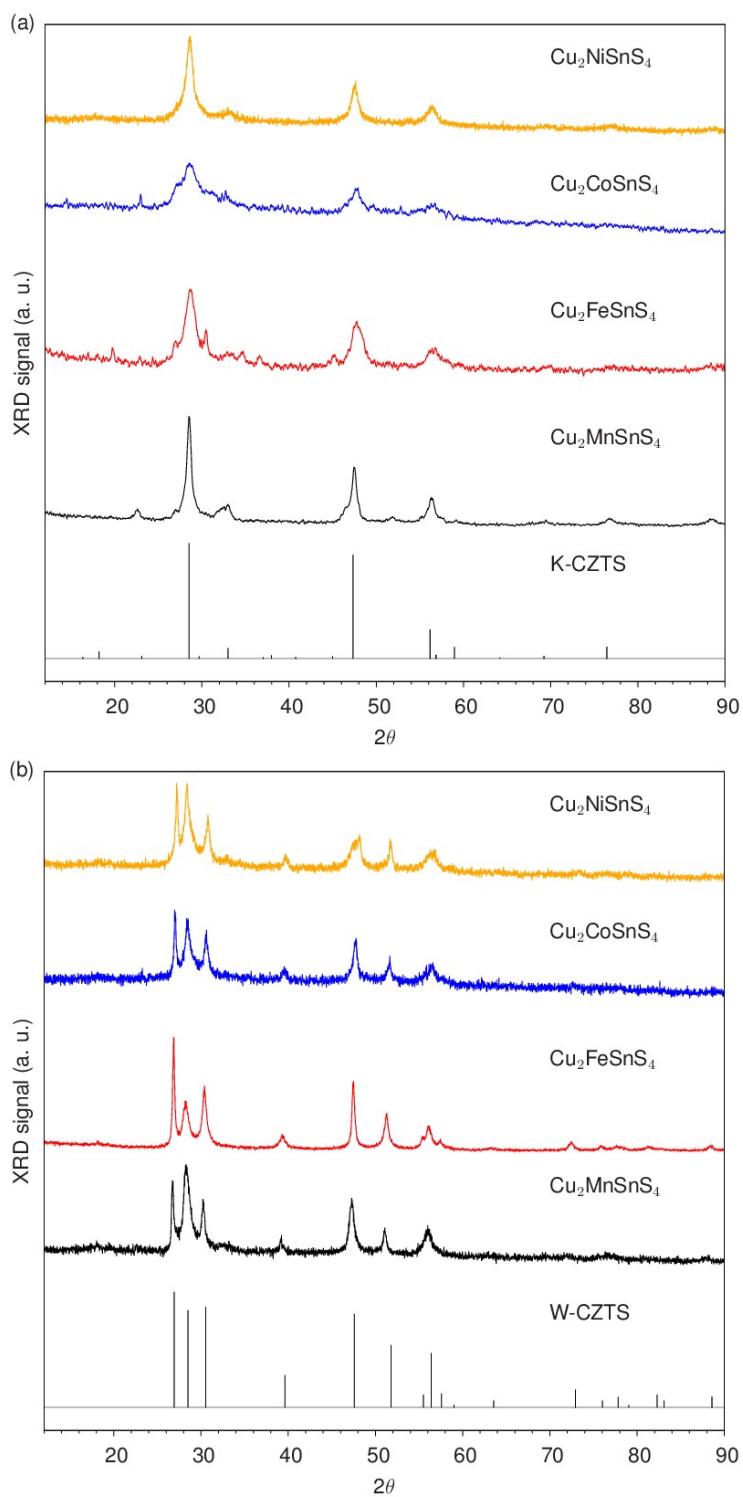

Fig. S4. XRD patterns of products fabricated with 2-stage heating process by substituting Zn with Mn, Co, and Ni using a mixed solvent with EG:TETA ratios of 39:1 (a) and 20:20 (b). The Mn, Fe, Co, and Ni sources are  $\text{Mn}(\text{Ac})_2 \cdot 2\text{H}_2\text{O}$ ,  $\text{FeCl}_3$ ,  $\text{Co}(\text{Ac})_2 \cdot 4\text{H}_2\text{O}$ , and  $\text{Ni}(\text{Ac})_2 \cdot 4\text{H}_2\text{O}$ , respectively.

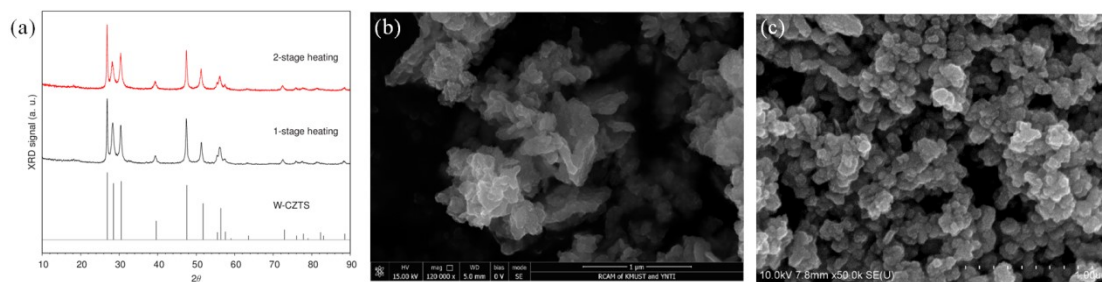

Fig. S5. (a) XRD patterns and (b)-(c) SEM images of products synthesized with 1-stage and 2-stage heating processes, respectively. The EG:TETA ratio is 20:20.
